# Supplementary material
Source: PubMed Central journal article supplement (PMC7315682)
Supplement: DS_10.1177_0022034519892563.pdf [file DS_10.1177_0022034519892563.pdf]

# The Role of Discoidin Domain Receptor 2 in Tooth Development

F. F. Mohamed, C. Ge, A. Binrayes, and R. T. Franceschi

## Appendix

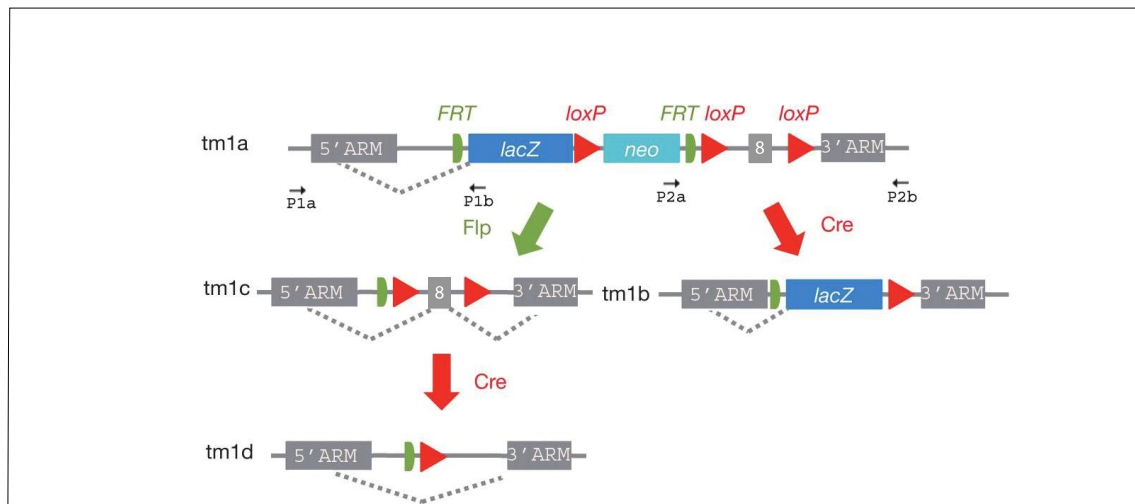

**Appendix Figure 1: Development of *Ddr2*-LacZ-knockin mice and *Ddr2* conditional knockout (*Ddr2<sup>fl/fl</sup>*) mice.** To generate a *Ddr2* knockout first mouse line (tm1a), ES cell transplantation was performed by the University of Michigan Transgenic Model core. To generate *Ddr2<sup>fl/fl</sup>* mice, knockout first mice were crossed with FLPO mice to remove LacZ-Neo elements (tm1c). Mice were bred into a C57BL6 background for at least 6 generations. Treatment with adenoCre removes exon 8 (tm1d).

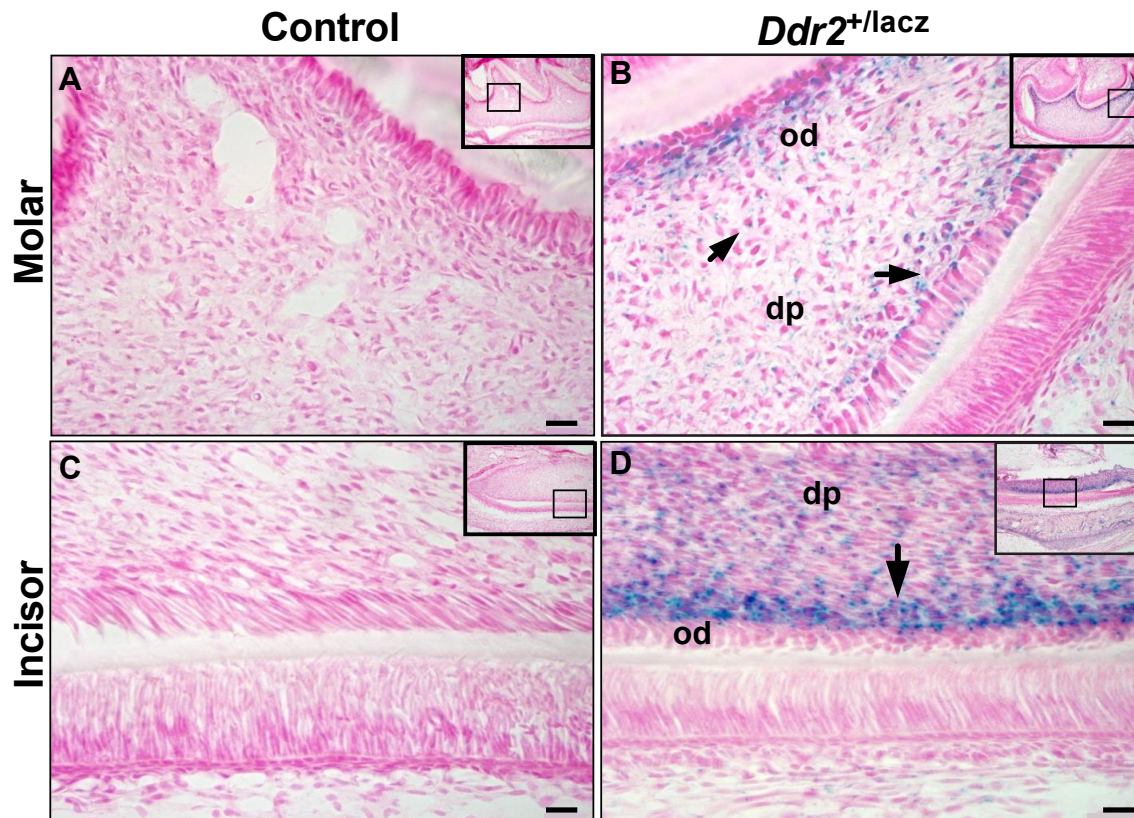

**Appendix Figure 2. Specificity of *Ddr2-lacZ* staining in dental tissues.** (A,C) No X-Gal staining in the *Ddr2*<sup>+/+</sup> control molar and incisor teeth at P1. (B,D) X-Gal staining of *Ddr2*<sup>+/lacZ</sup> mice in the molar and incisor teeth at P1. Odontoblasts (od), dental pulp (dp). Arrows point to the LacZ staining. Scale bar: 20  $\mu$ m in (A-D).

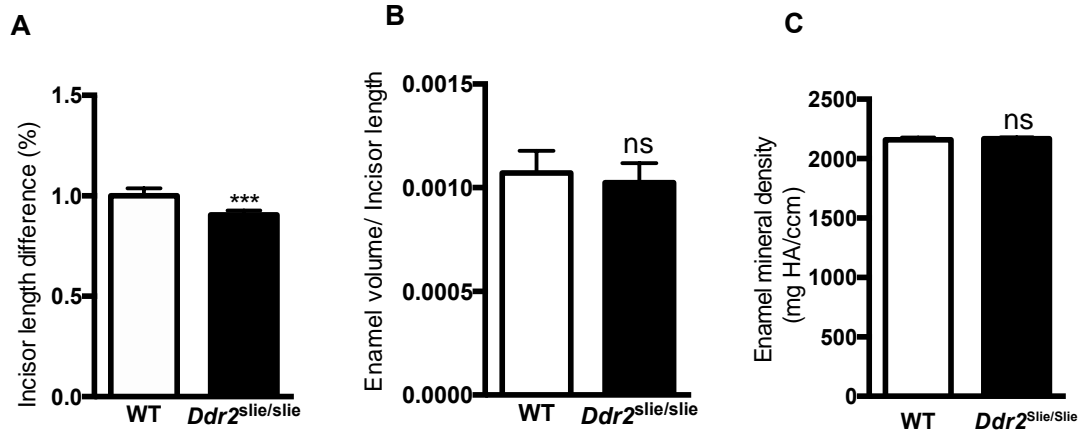

**Appendix Figure 3. (A-C)** Quantification the incisor length, enamel volume and mineral density.  
\*\*\* $P < 0.001$ , ns: not significant

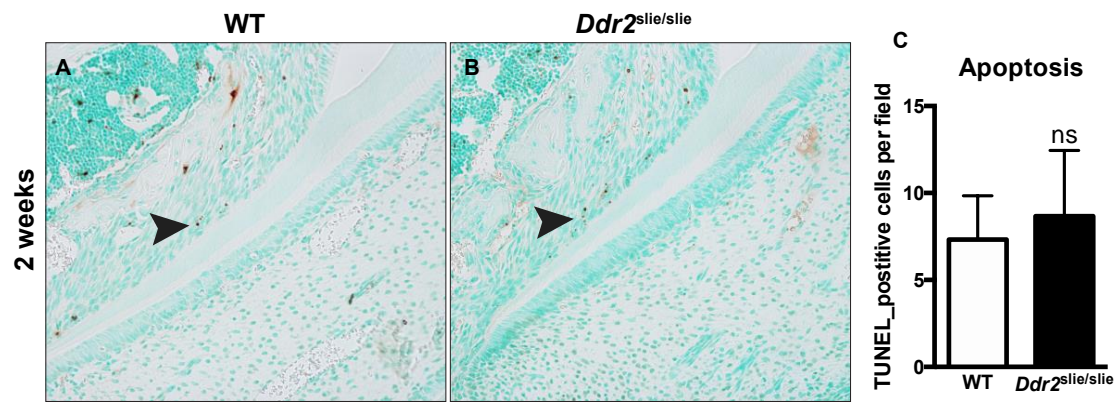

**Appendix Figure 4.** (A,B) Representative images of TUNEL staining of the first molars in *Ddr2*<sup>slie/slie</sup> and WT mice. (C) Quantification of TUNEL-positive cells (brown) per field. Cell nuclei were stained with methyl green (green),  $n=3$  mice per group. ns: not significant

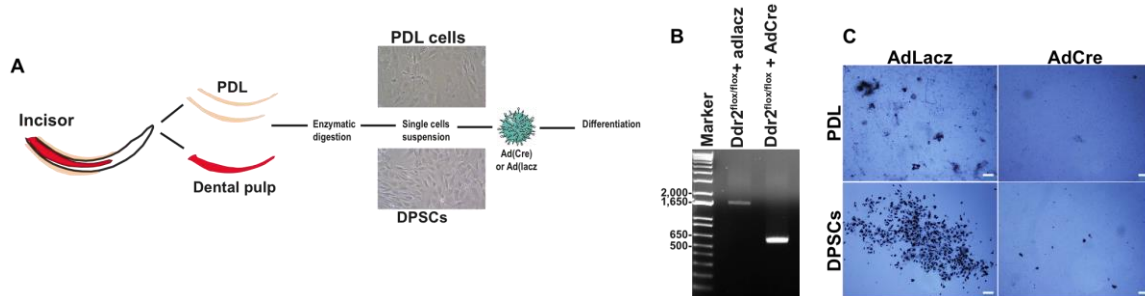

**Appendix Figure 5. Isolation and adenoCre treatment of PDL and DPSCs. (A)**

Experimental design of cell isolation, viral transduction, and differentiation in vitro. Ten mandibular incisors were extracted from 3-month old *Ddr2<sup>fl/fl</sup>* mice and flushed with Dulbecco's modified Eagles' medium (DMEM, Invitrogen). A complete flush of dental pulp was checked under a dissection microscope (Nikon SMZ 745T). Dissected tissues from PDL and dental pulp were digested with Collagenase P (Roche) for preparation of primary cultures. PDL and dental pulp stromal cells (DPSCs) were plated in 12 well plates at a density of  $1 \times 10^5$  cells for adenovirus infection and differentiation experiments. **(B)** PCR analysis showing Cre-mediated recombination of the floxed *Ddr2* alleles resulting in a PCR product of 600bp after treatment with AdCre. **(C)** Bright-field images of von Kossa staining of PDL and DPSC cells after differentiation for 21 days in vitro, scale bar: 200  $\mu$ m in (C).
